# Supplementary material for: Mechanical mapping of mammalian follicle development using Brillouin microscopy
Source: PubMed Central journal article supplement (PMC8476509; doi:10.1038/s42003-021-02662-5), 2021-09-27
Supplement: 42003_2021_2662_MOESM2_ESM.pdf [file 42003_2021_2662_MOESM2_ESM.pdf]

## Description of Additional Supplementary Files

**File name:** Supplementary Data 1.

**Description:** Raw data for Fig. 3c.

**File name:** Supplementary Data 2.

**Description:** Raw data for Fig. 4c.
